# Supplementary material
Source: Springer Nature journal article supplement (https://www.springermedizin.de/resource/supplementary/12884_2013_1001_MOESM2_ESM.pdf/9458742)

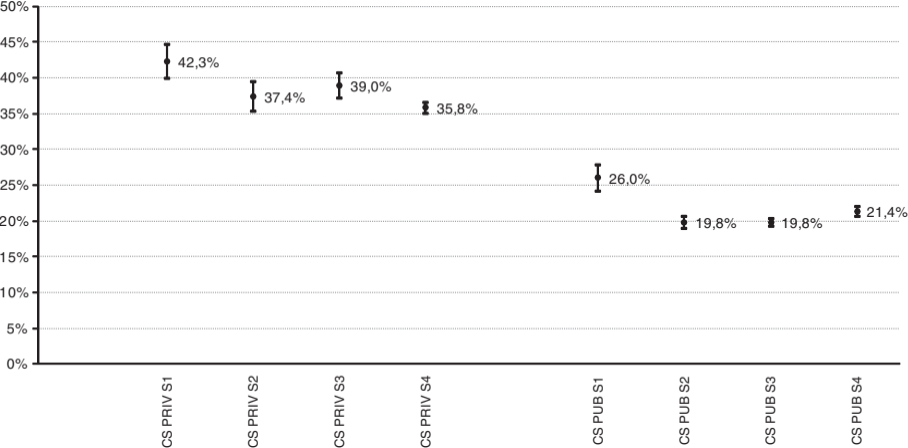

Supplement: MOESM2 [file 9458742]
